# Supplementary material for: Dynamical insights from a heterogeneous whole-brain model of pre- versus post-visual-motor task
Source: Research Square preprint supplement (doi:10.21203/rs.3.rs-6825127/v1), 2025-06-13
Supplement: Supplementary file 1 [file ab5b9814d67277ce460bd63d.docx]

1. Reconstruction of LFP based on dipole theory

Since pyramidal neurons are perpendicular to the cortical surface, with dendrites facing the cortical surface and axons pointing to the grey matter-white matter border, the central dipole orientation is also set perpendicular to the cortical surface. The dipole theory is used to reconstruct the local field potentials (LFPs) and the theory of Demont-Guignard (2009) is considered in this study (Demont Guignard et al. 2009). The assumptions include, on the one hand, that each neuronal mass model is considered as a dipole, located in a brain tissue with uniform conductivity (σ = 1), on the other hand, according to the superposition theory, the total LFP of a given brain region is the instantaneous summation of itself and the contribution of the remaining brain regions. The specific LFP formula is as follows:

(1)

where is the conductivity, is the distance from cell i to the measurement point (i.e., the recording electrode), is a unit vector on a straight line from neuron to the recording point , is the dipole moment, and N is the total number of brain regions (1≤N≤68).

1. Nodal model of neurovascular coupling
   1. Reverse Neural Mass Model (RNMM)

The NMM was used in this study is an established and validated neural population model (Jansen and Rit 1995) including two sub-populations corresponding to pyramidal cells and interneurons, respectively. The linear transformation function labeled and , convert presynaptic potentials (mean pulse density of action potentials) to postsynaptic potentials (excitatory postsynaptic potential (EPSP) and inhibitory postsynaptic potential (IPSP)). The following expressions for unit impulse response generating blocks have been used:

(t)=Aa，(t)=Bb (2)

where A is the excitatory synaptic gain and B is the inhibitory synaptic gain. Parameters and are the excitatory and inhibitory mean synaptic gains which are used to regulate the postsynaptic potential (PSP), respectively. These four parameters of A, B, a and b can regulate the sensitivity of excitatory and inhibitory synapses and determine the excitatory and inhibitory properties of the model.

The static nonlinear function S(v) have been depicted by the following formula:

(3)

where is the maximum firing rate of the neural population, is PSP relatives to the , the steepness of the sigmoidal transformation, and is the presynaptic mean membrane potential.

The interactions between two sub-populations are characterized by the four connectivity constants ~ . These connectivity constants represent the average number of synaptic connections between and among pyramidal cells, excitatory cells and inhibitory interneurons. At the same time a lumped connectivity constant parameter (C) to relate these four connectivity constants, and the relationship is specified as C = C1, C2 = 0.8C, C3 = 0.25C and C4 = 0.25C.

The PSP is described by a first-order ordinary differential equation of the form:

(4)

where G and g denote the parameters in the excitability condition or the parameters in the suppression condition. In the excitatory case, G=A, g=a, and in the inhibitory case, G=B, g=b. and are the input and output signals of the sub-populations, respectively.

The Reverse Neural Mass Model (RNMM) modified by NMM (Jansen and Rit 1995). Using the following differential equations to describe the whole-brain Reverse Neural Mass Model (wRNMM):

(5)

where , and  are the outputs of the three PSP blocks, respectively. is the contribution of the current node to all other nodes. Connectivity constants , attenuate the output of column before it is fed to the n column. The above system of differential equations is solved using the ode45 method.

was firstly normalized to ensure that its magnitude was similar to *.* To ensure the accuracy of the PSP, the values of A, B and C are adjusted to maximize the match between the and . The optimization method was simulated annealing method, and the error cost function was root mean square error:

(6)

where is the number of time point.

- 1. Metabolic Hemodynamic Model

The interpretation and values of MHM parameters are displayed in Table. 1. The equations relating these biological processes are as follows:

Table. 1 Interpretation and values of the parameters used in the simulations

| Parameter | Interpretation | | Value |
| --- | --- | --- | --- |
|  | | Efficacy of glucose consumption response to excitation | 1 |
|  | | Efficacy of glucose consumption response to inhibition | 1 |
|  | | Time-constant of the excitatory glucose consumption impulse response | 1 |
|  | | Time-constant of the inhibitory glucose consumption impulse response | 0.8 |
| c | | Steepness of the sigmoid function x | 2.5 |
| d | | Position of the threshold of the sigmoid function x | 1.6 |
|  | | Delay between excitatory neuronal activity and corresponding glucose consumption. | 0.1s |
|  | | Delay between inhibitory neuronal activity and corresponding glucose consumption | 0.1s |
|  | | Delay between excitatory neuronal activity and CBF response | 0.2s |
|  | | Baseline ratio of excitatory to inhibitory synaptic activity in the voxel | 5 |
|  | | Efficacy of blood flow response to excitation | 0.6 |
|  | | Constant for CBF signal decay | 1.5 |
|  | | Constant for CBF autoregulatory feedback | 2.4 |
|  | | Transit time through the balloon | 1s |
|  | | Coefficient of the steady state flow–volume relationship | 0.4 |
|  | | Weight for deoxyhemoglobin change | 3.4 |
|  | | Weight for blood volume change | 1 |
|  | | Baseline blood volume | 0.02 |

The glucose consumed for excitatory activity is given by:

(7)

The glucose consumed for inhibitory activity is given by:

(8)

and are the total glucose consumption signals are given by:

(9)

The equations of total oxygen consumption m(t) are as follows:

(10)

There are specific details of the derivation of the equations describing this relationship (Sotero and Trujillo-Barreto 2007). For the simulation of CBF, MHM used the model of others (Friston et al. 2000). It also attached the hypothesis that CBF is not coupled to inhibition activity.

(11)

At the same time, the Balloon model (Buxton et al. 2004) is employed for linking the output of the metabolic and vascular models to normalized cerebral blood volume (v) and deoxyhemoglobin content (*q*). Knowing q and v, the BOLD signal is calculated as in (Buxton et al. 2004).

(12)

Given q and v, the BOLD signal is described as:

(13)

1. Segmentation of cognitive subnetworks

The following table shows the correspondence between cognitive sub-networks and DK brain regions (ROIs) (Tao et al. 2013).

Table. 2 The table demonstrated the segmented subnetworks and their constituting brain regions (ROI). Each ROI is symmetric in the ipsilesional and contralesional hemispheres.

| **ROI** | **Subnetwork** |
| --- | --- |
| inferior parietal | Attention Network (ATT) |
| lateral occipital |
| medial orbitofrontal |
| pars opercularis |
| pars orbitalis |
| pars triangularis |
| rostral middle frontal |
| superior parietal |
| frontal pole |
| bankssts | Auditory Network (ADN) |
| superior temporal |
| supramarginal |
| transverse temporal |
| insula |
| middle temporal | Default Mode Network (DMN) |
| precuneus |
| superior frontal |
| caudal anterior cingulate |
| isthmus cingulate |
| lateral orbitofrontal |
| posterior cingulate |
| rostral anterior cingulate |
| temporal pole |
| caudal middle frontal |
| paracentral | Sensory Motor Area (SMA) |
| postcentral |
| precentral |
| entorhinal | Subcortical Network (SN) |
| inferior temporal |
| parahippocampal |
| cuneus | Visual Recognition Network (VRN) |
| fusiform |
| lingual |
| pericalcarine |

1. Variation of the FC sub-networks at the group level

The following Fig. 1 shows the average FC results over the subnetwork, in which A (a) is the average FC result before the task and A (b) is the average FC result after the task. Furthermore, to further observe the matrix variation, we obtain the difference of the two matrixes (a2 - a1) and binarize it according to 0, as shown in A (c). Also, we represented the enhanced and reduced connections in the matrix as a chord diagram as in B(a-b), and we calculated network topological metrics including average degree, betweenness centrality, clustering coefficient, and characteristic path length as in B(c).


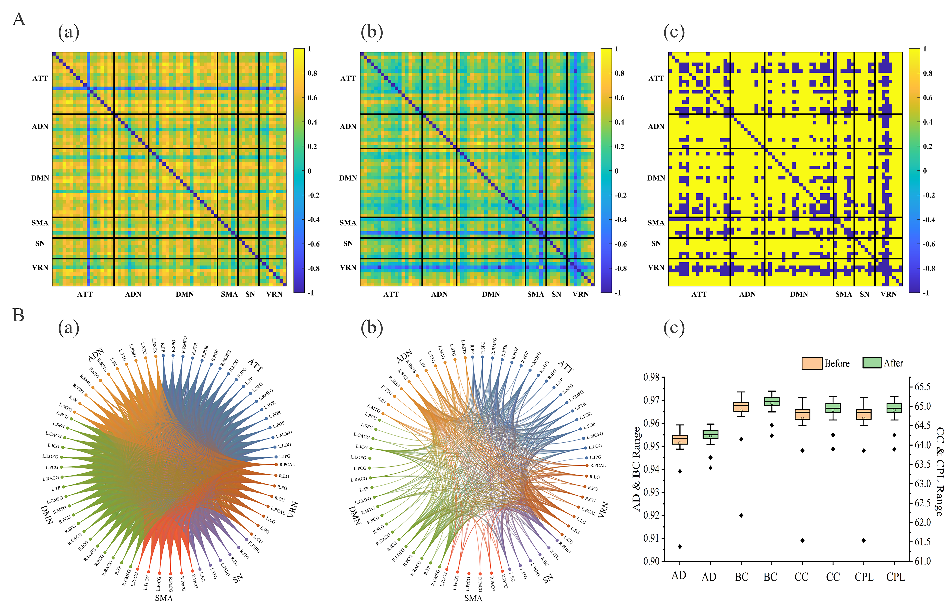


**Fig. 1.** Variation of the FC sub-networks at the group level. (A) Results of the mean FC before visual-motor task (a), and after the visual-motor task (b), as well as matrix of binary changes in FC after the task compared to before the task (c). (B) FC enhanced (a) and reduced (b) connections on the sub-network as a chord diagram, as well as network topological metrics (c).

1. Differences in optimized parameters on the sub-network before and after the task

At the sub-network level, the model-optimized parameters A, B, and C were found to vary before and after the task. On the one hand, parameter A in the ATT was found to increase in the group. Parameter A in SMA and parameters A and C in VRN were found to increase more. On the other hand, there was no significant trend in the other sub-networks for these parameters and the detailed results are shown in Fig. 2.


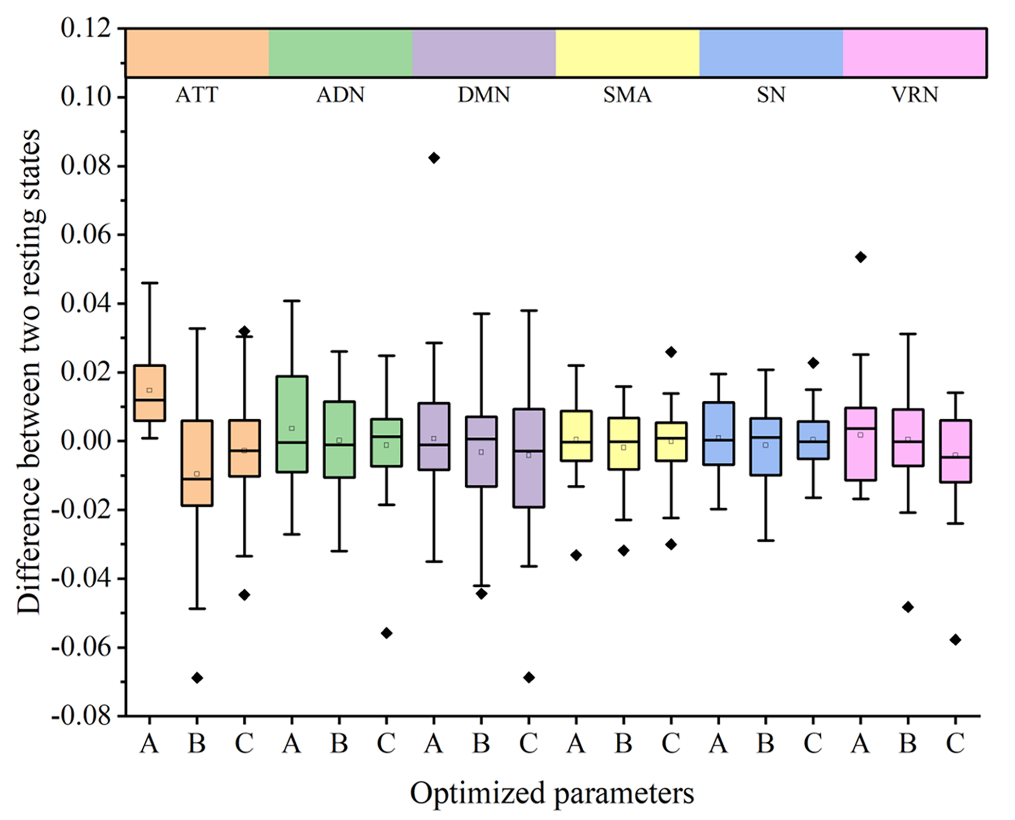


**Fig. 2.** Differences in optimized parameters on the sub-network before and after the task.

References

1. Buxton, R. B., K. Uludağ, D. J. Dubowitz, et al. (2004) Modeling the hemodynamic response to brain activation. Neuroimage 23:S220-S233. <https://doi.org/10.1016/j.neuroimage.2004.07.013>
2. Demont Guignard, S., P. Benquet, G. Coiret, et al. 2009. Interpretation of intracerebral-EEG epileptic spikes from detailed modeling of neural networks. Paper read at 2009 4th International IEEE/EMBS Conference on Neural Engineering.
3. Friston, K. J., A. Mechelli, R. Turner, et al. (2000) Nonlinear responses in fMRI: the Balloon model, Volterra kernels, and other hemodynamics. Neuroimage 12:466-477. <https://doi.org/10.1006/nimg.2000.0630>
4. Jansen, B. H., V. G. Rit (1995) Electroencephalogram and visual evoked potential generation in a mathematical model of coupled cortical columns. Biol Cybern 73:357-366. <https://doi.org/10.1007/BF00199471>
5. Sotero, R. C., N. J. Trujillo-Barreto (2007) Modelling the role of excitatory and inhibitory neuronal activity in the generation of the BOLD signal. Neuroimage 35:149-165. <https://doi.org/10.1016/j.neuroimage.2006.10.027>
6. Tao, H., S. Guo, T. Ge, et al. (2013) Depression uncouples brain hate circuit. Mol psychiatr 18:101-111. <https://doi.org/10.1038/mp.2011.127>
